# Supplementary material for: Multimodal imaging and deep learning unveil pulmonary delivery profiles and acinar migration of tissue-resident macrophages in the lung
Source: Research Square preprint supplement (doi:10.21203/rs.3.rs-2994336/v1), 2023-06-28
Supplement: Supplementary file 2 [file de52596352ac2595ab59a753.pdf]

| Initial deposition features (t=0h)                             | Intranasal liquid aspiration (INLA)                                                            | Intratracheal Liquid Instillation (ITLI)           | ventilator-assisted aerosol delivery (VAAD)             | nose-only aerosol inhalation (NOAI)                     |
|----------------------------------------------------------------|------------------------------------------------------------------------------------------------|----------------------------------------------------|---------------------------------------------------------|---------------------------------------------------------|
| Type of application of NP suspension                           | bulk liquid                                                                                    | bulk liquid                                        | liquid aerosol                                          | liquid aerosol (dried)                                  |
| Volume-median aerodynamic diameter of inhaled aerosol (μm)     | N/A                                                                                            | N/A                                                | 2.8 ± 1.58*                                             | 0.7±0.1**                                               |
| Invested liquid volume (μl)                                    | 50                                                                                             | 50                                                 | 20                                                      | 190                                                     |
| Invested dose (μg)                                             | 34.7                                                                                           | 25                                                 | 166.7                                                   | 475                                                     |
| Deposited dose fraction (lung + trachea)                       | 28.1% ± 16.6%                                                                                  | 59.2% ± 14.47%                                     | 4.24 % ± 1.58 %                                         | 0.19% ± 0.02%                                           |
| Deposited dose (lung + trachea) (μg)                           | 9.7 ± 5.76                                                                                     | 14.1 ± 3.68                                        | 7.06 ± 2.63                                             | 0.91 ± 0.12                                             |
| Deposited dose (lung without trachea) (μg)                     | 9.7 ± 5.76                                                                                     | 14.1 ± 3.68                                        | 4.50 ± 1.58***                                          | 0.91 ± 0.12                                             |
| Homogeneity of depo. pattern                                   | patchy                                                                                         | patchy                                             | homogeneous                                             | homogeneous                                             |
| Central/peripheral dose (C/P) ratio (uniform: C/P=1)           | 3.79 ± 0.72                                                                                    | 2.28 ± 0.27                                        | 1.37 ± 0.13                                             | 1.32 ± 0.14                                             |
| Bronchial/acinar dose ratio                                    | 0.49 ± 0.14                                                                                    | 0.23 ± 0.05                                        | 0.12 ± 0.02                                             | 0.08 ± 0.01                                             |
| Bronchial deposited fraction                                   | 0.32 ± 0.06                                                                                    | 0.18 ± 0.03                                        | 0.11 ± 0.02                                             | 0.08 ± 0.01                                             |
| Acinar deposited fraction                                      | 0.67 ± 0.07                                                                                    | 0.81 ± 0.03                                        | 0.89 ± 0.02                                             | 0.92 ± 0.01                                             |
| Apparent NP volume/dose (μm <sup>3</sup> /μg) in bronchi       | 1.77E+07 ± 3.85E+06                                                                            | 4.17E+07 ± 2.08E+07                                | 5.28E+07 ± 1.90E+07                                     | 3.86E+08 ± 3.53E+08                                     |
| Apparent NP volume/dose (μm <sup>3</sup> /μg) in acini         | 4.92E+07 ± 1.40E+07                                                                            | 1.14E+08 ± 4.32E+07                                | 1.60E+08 ± 4.82E+07                                     | 1.27E+09 ± 5.63E+08                                     |
| Apparent NP-covered volume fraction in bronchi                 | 0.12 ± 0.05                                                                                    | 0.19 ± 0.04                                        | 0.05 ± 0.02                                             | 0.03 ± 0.01                                             |
| Apparent NP-covered volume fraction in acini                   | 0.07 ± 0.02                                                                                    | 0.18 ± 0.04                                        | 0.13 ± 0.03                                             | 0.14 ± 0.09                                             |
| Upper/lower half of lung                                       | preferential in upper/central                                                                  | preferential in upper/central                      | uniform                                                 | uniform                                                 |
| bronchial (dose/area): central or peripheral preference        | High deposition in secondary bronchi; central bronchiolar deposition in upper part of the lung | central bronchioles                                | equal deposition in central to peripheral (bronchioles) | equal deposition in central to peripheral (bronchioles) |
| inter-acinar (dose per area): central or peripheral preference | Central acini received most of NPs; peripheral acini had little/no particles                   | central acinar received most of NPs                | Equal central to peripheral acinar deposition           | Equal central to peripheral acinar deposition           |
| intra-acinar (dose per area): proximal or distal preference    | highly proximal acinar region (PAR)                                                            | highly PAR                                         | slightly PAR                                            | relatively uniform                                      |
| not/poorly exposed lung regions                                | peripheral acini and distal acinar region (DAR)                                                | A few peripheral acini and DAR of peripheral acini | DAR of all acini                                        | slight DAR of all acini                                 |
| Additional features                                            | little trachea deposition                                                                      | little trachea deposition                          | hot spot trachea (20-40% of total deposition)           | little trachea deposition                               |

| Longitudinal NP deposition features (t=2h, 24h, 14d) |                   |                              |                              |                   |
|------------------------------------------------------|-------------------|------------------------------|------------------------------|-------------------|
| inter-acinar Biokinetics (t=2h, 24h, 14w)            | no data available | No NP-transfer bewteen acini | No NP-transfer bewteen acini | no data available |
| intra-acinar Biokinetics (t=2h, 24h, 14w)            |                   | NP transport in PAR and DAR  | NP transport in PAR and DAR  |                   |
| Bronchial deposited fraction_2h                      |                   | 0.11 ± 0.01                  | 0.11 ± 0.01                  |                   |
| Bronchial deposited fraction_24h                     |                   | 0.11 ± 0.04                  | 0.10 ± 0.03                  |                   |
| Bronchial deposited fraction_14d                     |                   | 0.07 ± 0.01                  | 0.06 ± 0.01                  |                   |
| Acinar deposited fraction_2h                         |                   | 0.88 ± 0.01                  | 0.88 ± 0.01                  |                   |
| Acinar deposited fraction_24h                        |                   | 0.89 ± 0.04                  | 0.89 ± 0.02                  |                   |
| Acinar deposited fraction_14d                        |                   | 0.92 ± 0.01                  | 0.93± 0.01                   |                   |
| Retained dose fraction_2h                            |                   | 54.35% ± 3.88%               | 2.35% ± 0.40%                |                   |
| Retained dose fraction_24h                           |                   | 57.60% ± 1.56%               | 2.86% ± 0.83%                |                   |
| Retained dose fraction_14d                           |                   | 14.64% ± 3.14%               | 0.84% ± 0.11%                |                   |

\* The aerodynamic diameter of doplets of the melamin NP suspension was measured in dedicated experiments. There an ionic liquid-water mixture (instead of melamin NP suspension) was nebulized. After drying of these droplets into a spherical residue particle (ionic non-volatile liquid) we measured the particle diameter (using a scanning mobility particle sizer) and inferred the diameter of the original aerosol drop entering the trachea by accounting for the known water-ionic liquid mixing ratio (50:1).

\*\* Derived from the volume-weighted median equivalent mobility diameter (measured with scanning mobility particle sizer (SMPS)) and the density of melamin particles = 1.51 g/cm<sup>3</sup>.

\*\*\* Here only the lung deposited dose was displayed, the lung deposited dose = 166.7\*4.24\*0.60. Since ca 40% of dose is deposited to the lung trachea reported by Yang et al. Schmid, 2023, other administrations had very little NP trachea deposition
